# Supplementary material for: Double MOF gradually activated S bond induced S defect rich MILN-based Co(z)-NiMoS for efficient electrocatalytic overall water splitting
Source: Royal Society of Chemistry journal article supplement (doi:10.1039/d1nr06556d), 2021-01-01
Supplement: d1nr06556d1.pdf [file d1nr06556d1.pdf]

**Supplementary Information**  
**for**  
**MOF dual-purpose with rich S defects cactus like core-shell**  
**nanorods MILN-based Co(z)-NiMoS for an efficient**  
**electrocatalytic overall water splitting**

Honglei Chen<sup>a, b</sup>, Zebin Yu<sup>\*b</sup>, Yanping Hou<sup>b</sup>, Ronghua Jiang<sup>c</sup>, Jun Huang<sup>d</sup>, Wenjun Tang<sup>b</sup>, Zhaojun Cao<sup>b</sup>, Bo Yang<sup>b</sup>, Chunxiang Liu<sup>b</sup>, Haonan Song<sup>b</sup>

<sup>a</sup> Guangxi key Laboratory of Electrochemical Energy Materials, Guangxi University, Nanning 530004, P. R. China

<sup>b</sup> School of Resources, Environment and Materials, Guangxi University, Nanning 530004, P. R. China

<sup>c</sup> School of Chemical and Environmental Engineering, Shaoguan University, Shaoguan 512005, P. R. China

<sup>d</sup> College of Civil Engineering and Architecture, Guangxi University, Nanning 530004, P. R. China

\* Corresponding author. Tel./fax.: [+ 8613877108420](tel:+8613877108420)

## **S1. Experiment Section**

### **S1.1. Synthesis of ZIF-67.**

The ZIF-67 was prepared in accordance with previously reported methods. The process was as follows: 0.01 mol  $\text{Co}(\text{NO}_3)_2$  and 0.04 mol 2-methylimidazole were dispersed in 30 mL methanol respectively, and then mixed two solutions quickly and stirred for 24 h at ambient temperature. The product was centrifugated and washed with methanol several times. The obtained purple sample should be kept for 24 h in the vacuum oven at 60 °C.

### **S1.3. Synthesis of 20% Pt/C and $\text{RuO}_2$ electrode**

Pt/C and  $\text{RuO}_2$  catalysts were fabricated by methods elaborated elsewhere. In brief, 20 mg of 20 wt.% Pt/C or  $\text{RuO}_2$  was dissolved in a mixture of 180  $\mu\text{l}$  pure water, 200  $\mu\text{l}$  isopropanol and 20  $\mu\text{l}$  Nafion. That mixture was then ultrasonicated for 1 h to form a homogeneous ink. Subsequently, 40  $\mu\text{l}$  of the ink was loaded onto the NF. Last, the sample was placed in an oven and dried for further testing.

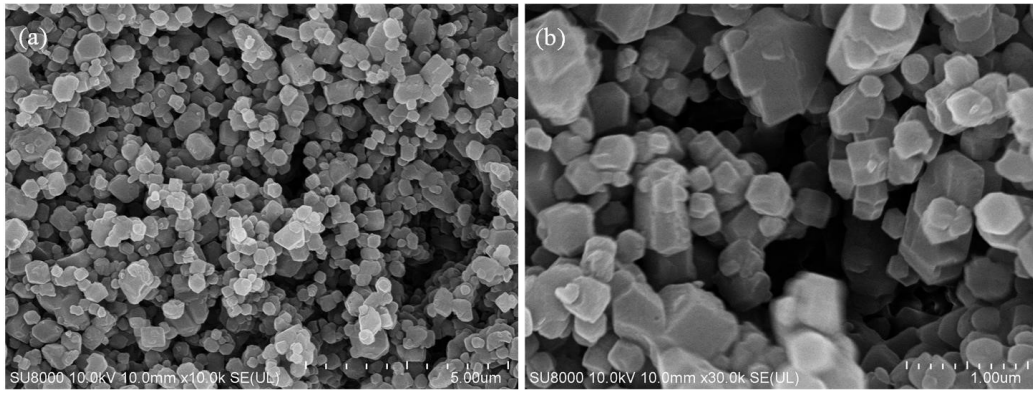

**Fig. S1.** SEM images of ZIF-67.

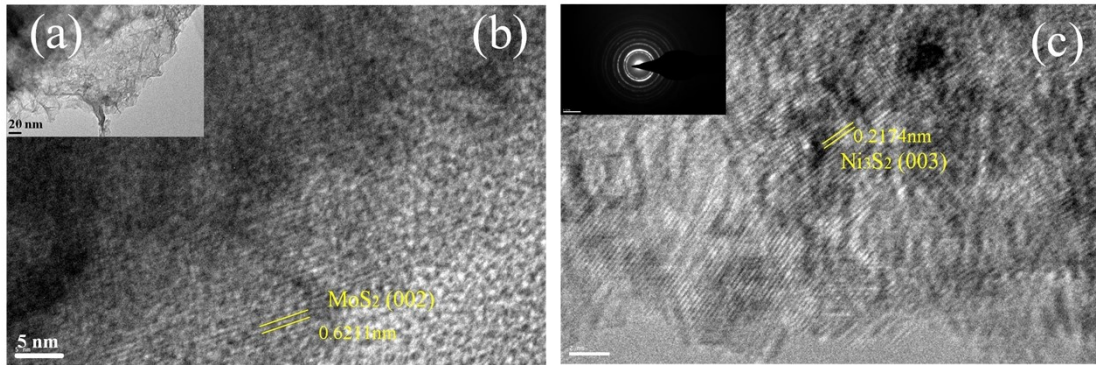

**Fig. S2.** TEM images of NiMoS.

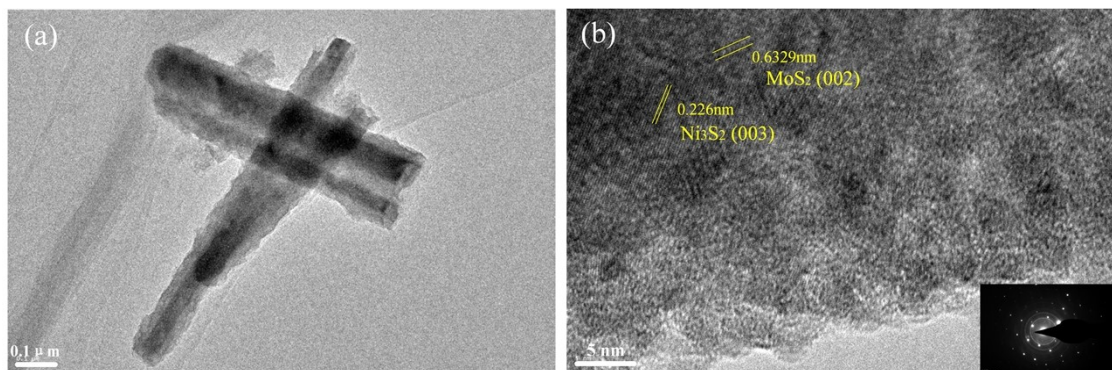

**Fig. S3.** TEM images of Co(z)-NiMoS.

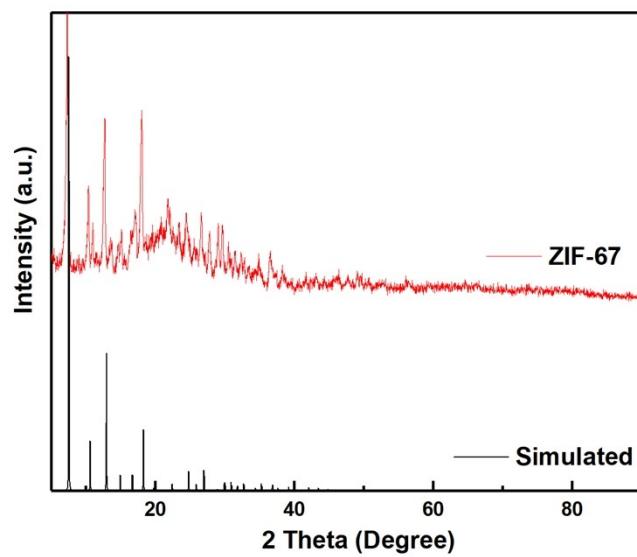

**Fig. S4.** XRD pattern of ZIF-67.

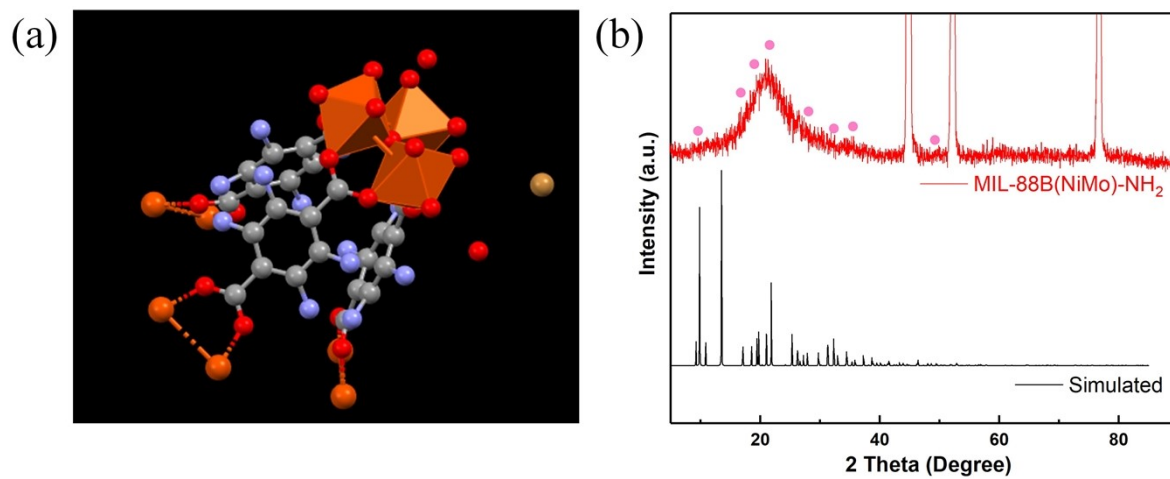

**Fig. S5.** (a) Simulation of atomic structure, (b) XRD pattern of MIL-88B(NiMo)-NH<sub>2</sub>.

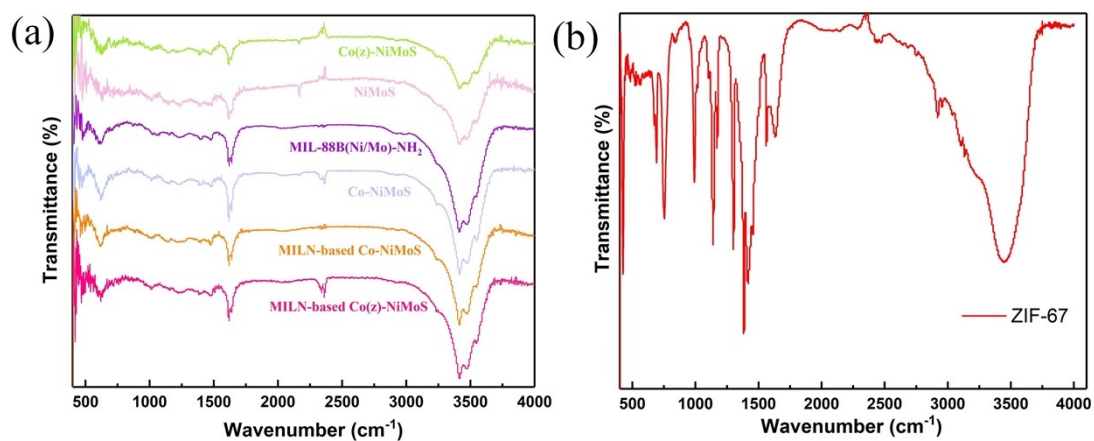

**Fig. S6.** FT-IR spectrum of materials.

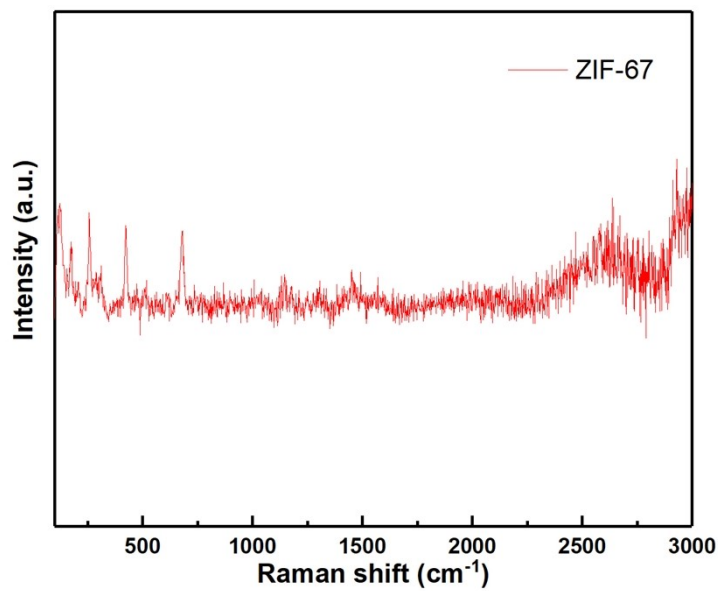

**Fig. S7.** Raman spectrum of ZIF-67.

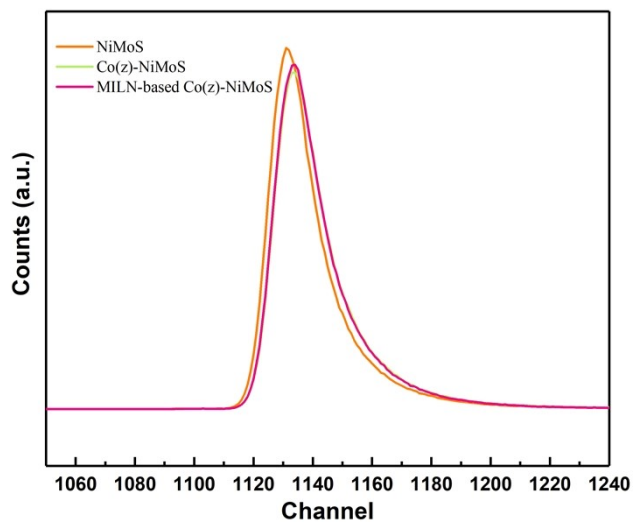

**Fig. S8** Positron lifetime spectra of NiMoS, Co(z)-NiMoS and MILN-based Co(z)-NiMoS.

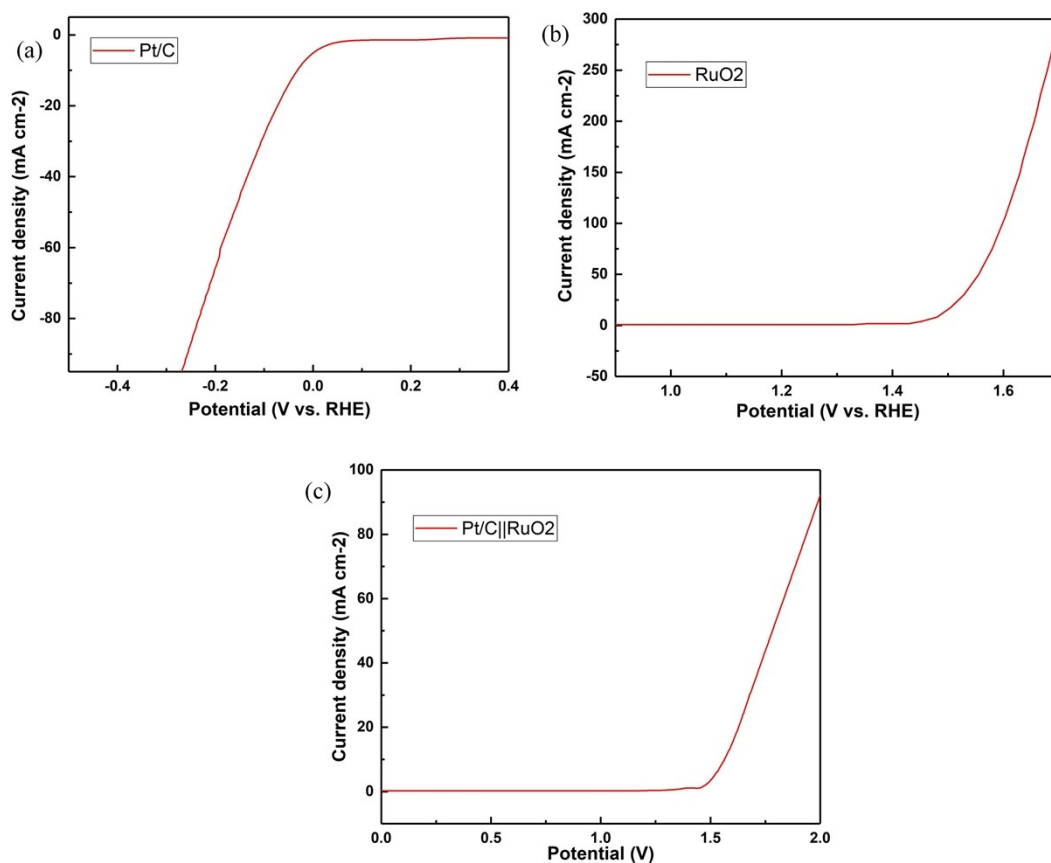

**Fig. S9.** IR-compensation LSV curves of (a) commercial Pt/C, (b) commercial RuO<sub>2</sub> and (c) two-electrode formed by commercial Pt/C and commercial RuO<sub>2</sub>.

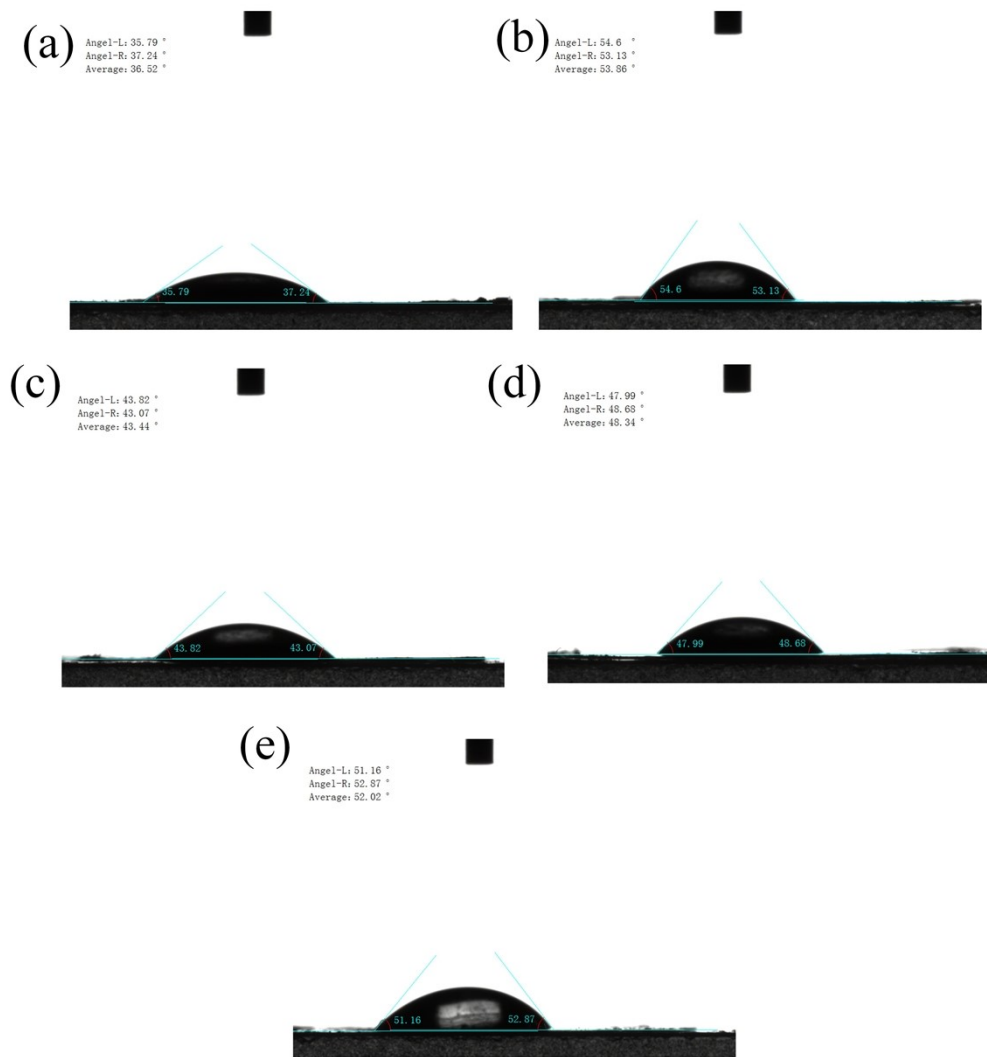

**Fig. S10.** Contact angle measurement of (a) MILN-based Co(z)-NiMoS, (b) NiMoS, (c) Co(z)-NiMoS, (d) Co-NiMoS and (e) MILN-based Co-NiMoS.

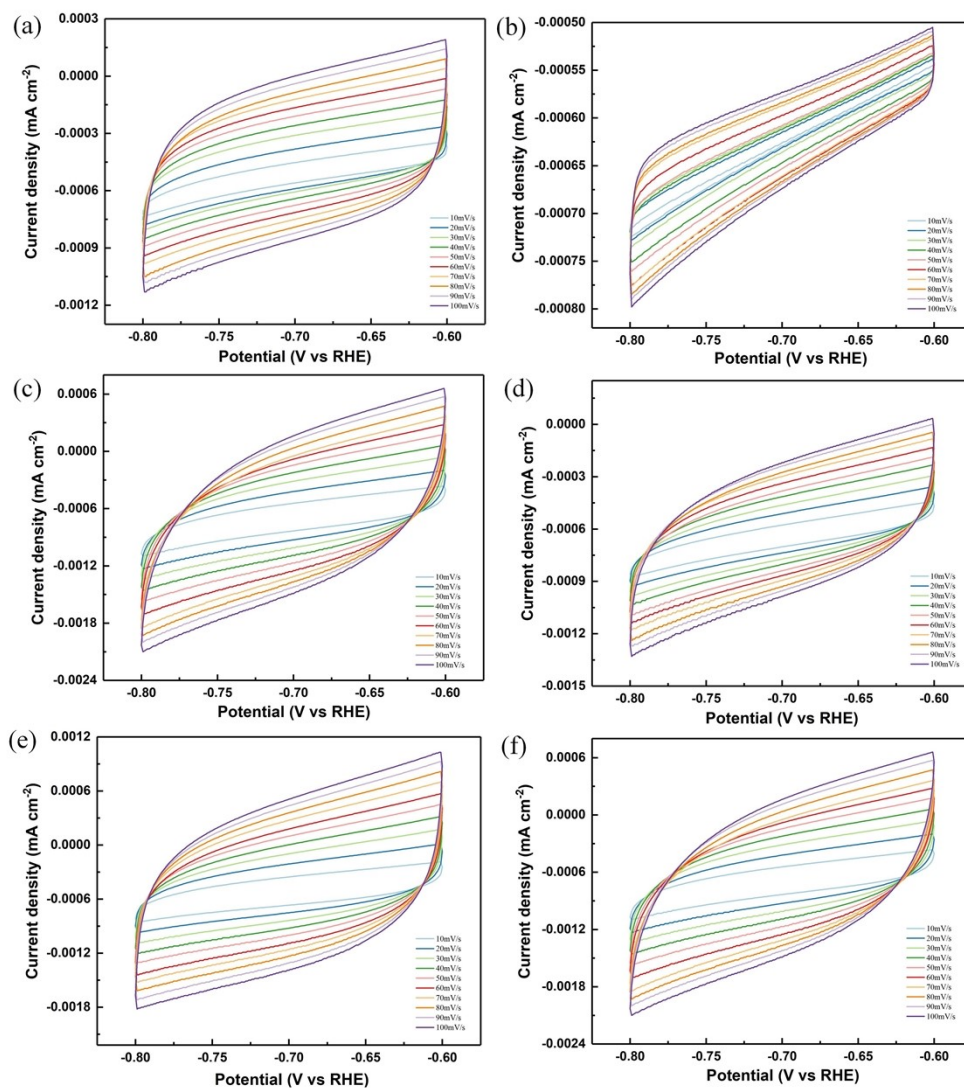

**Fig. S11.** CV curves of the prepared of different samples. (a) MILN-based Co(z)-NiMoS, (b) MIL-88B(Ni/Mo)-NH<sub>2</sub>, (c) NiMoS, (d) Co(z)-NiMoS, (e) Co-NiMoS (f) MILN-based Co-NiMoS. the corresponding CVs measured at different scan rates from 10 to 100 mV s<sup>-1</sup> current density at -0.70 V (vs. RHE) was plotted vs. scan rate.



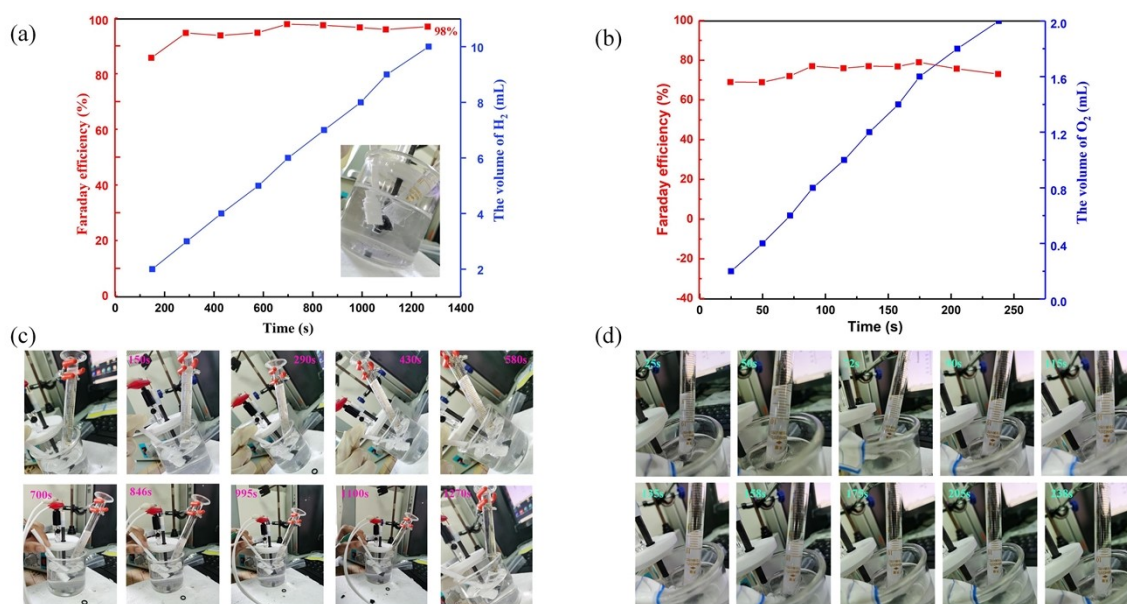

**Fig. S12.** (a) Faraday efficiency and the volume of H<sub>2</sub> of the MILN-based Co(z)-NiMoS for HER at various reaction time and photograph of Faraday efficiency test, (b) Faraday efficiency and the volume of O<sub>2</sub> of the MILN-based Co(z)-NiMoS for OER at various reaction time, (c-d) Photographs of H<sub>2</sub> and O<sub>2</sub> collected at various reaction times.

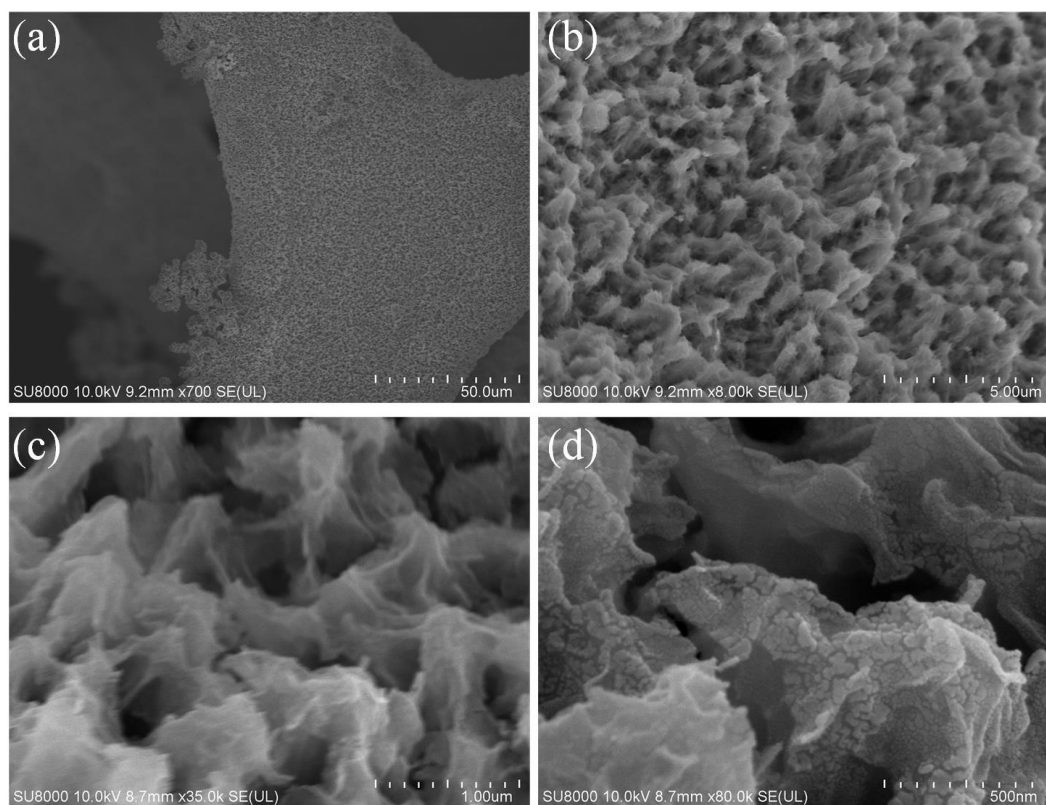

**Fig. S13.** SEM images of MILN-based Co(z)-NiMoS after HER stability test.

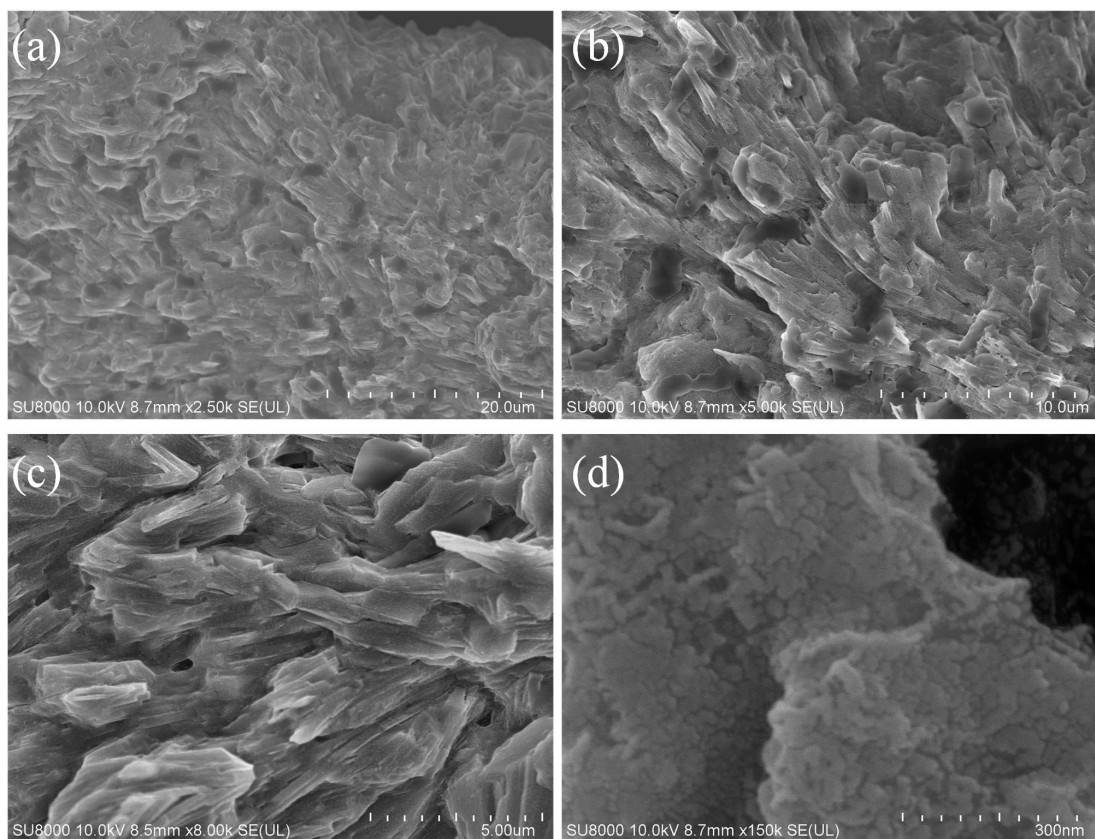

**Fig. S14.** SEM images of MILN-based Co(z)-NiMoS after OER stability test.

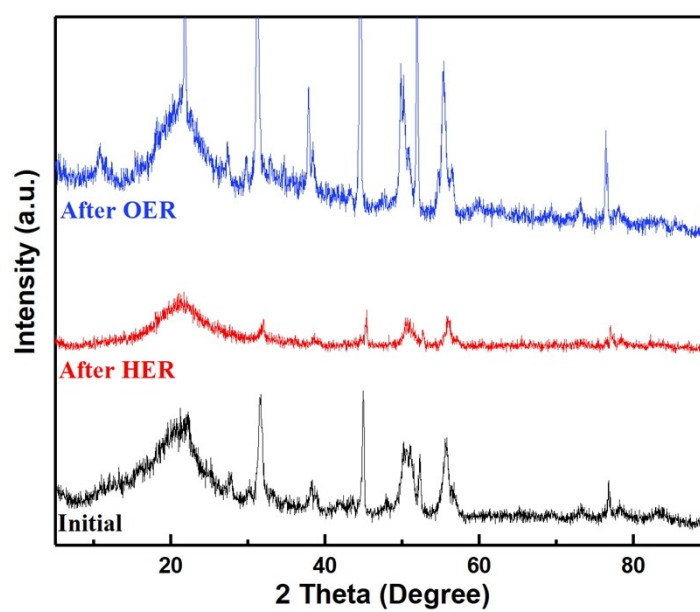

**Fig. S15.** XRD pattern of MILN-based Co(z)-NiMoS before and after stability test.

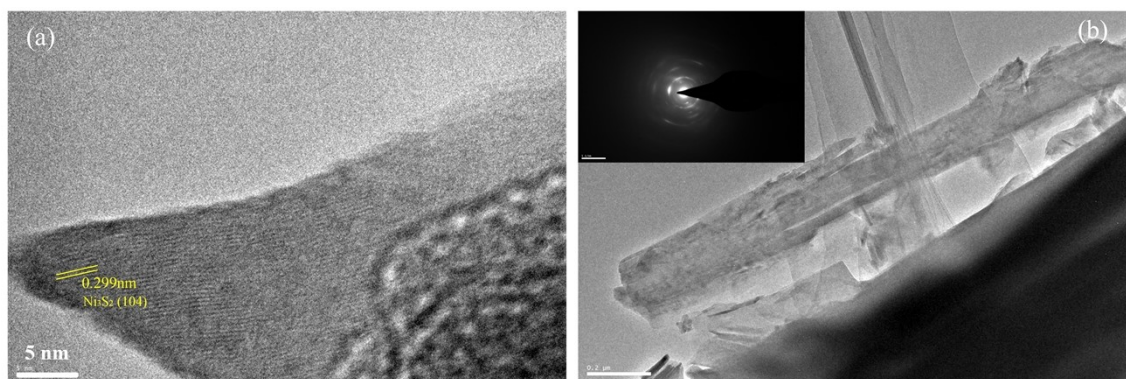

**Fig. S16.** TEM images of MILN-based Co(z)-NiMoS after HER stability test.

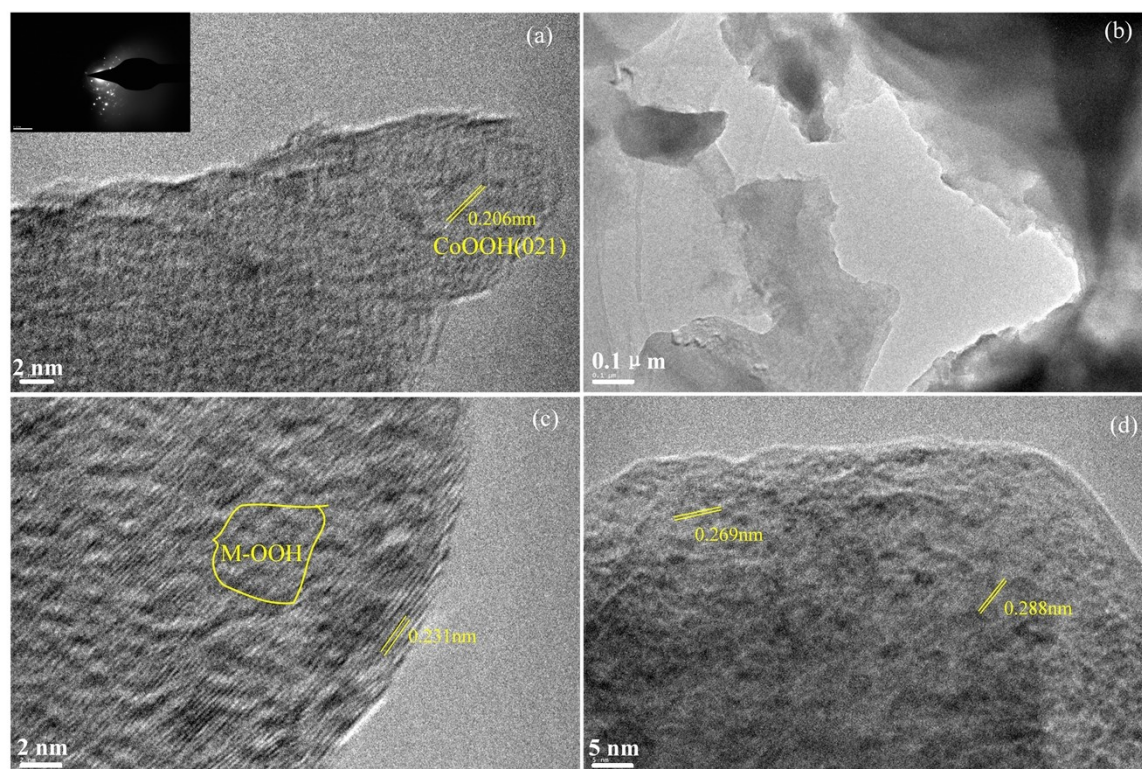

**Fig. S17.** TEM images of MILN-based Co(z)-NiMoS after OER stability test.

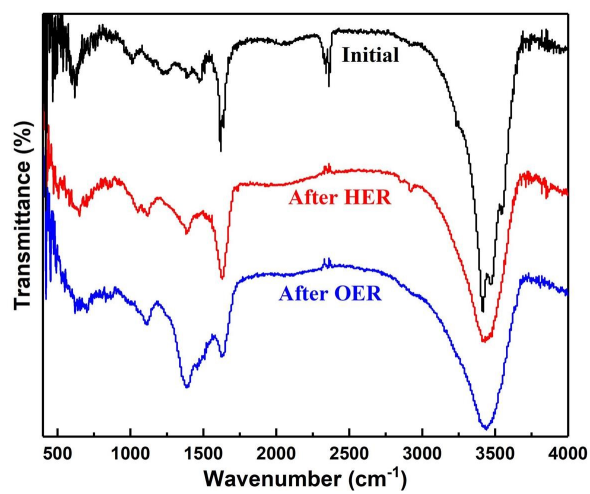

**Fig. S18.** FT-IR spectrum of MILN-based Co(z)-NiMoS before and after stability test.

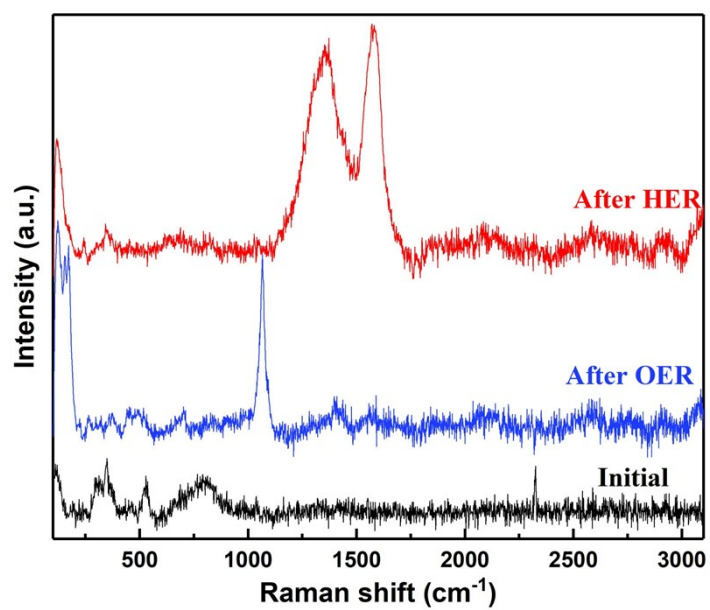

**Fig. S19.** Raman spectrum of MILN-based Co(z)-NiMoS before and after stability test.

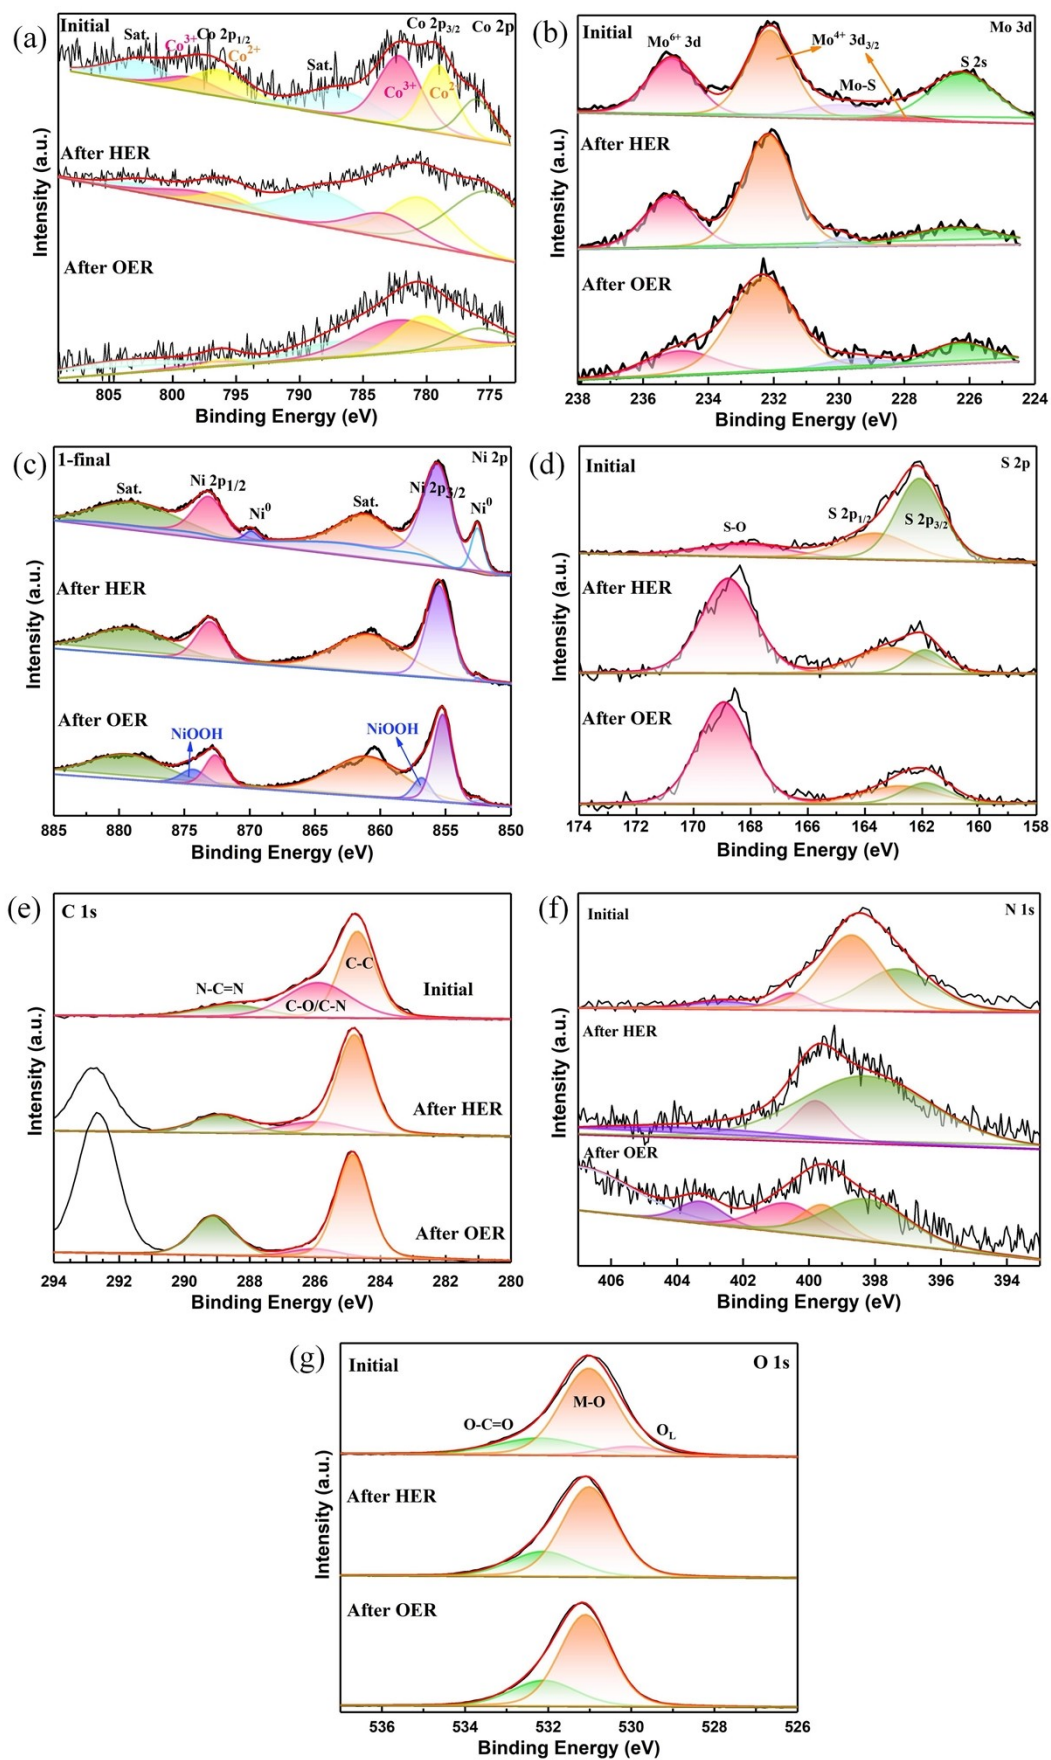

Fig. S20. XPS spectra of MILN-based Co(z)-NiMoS before and after stability test.

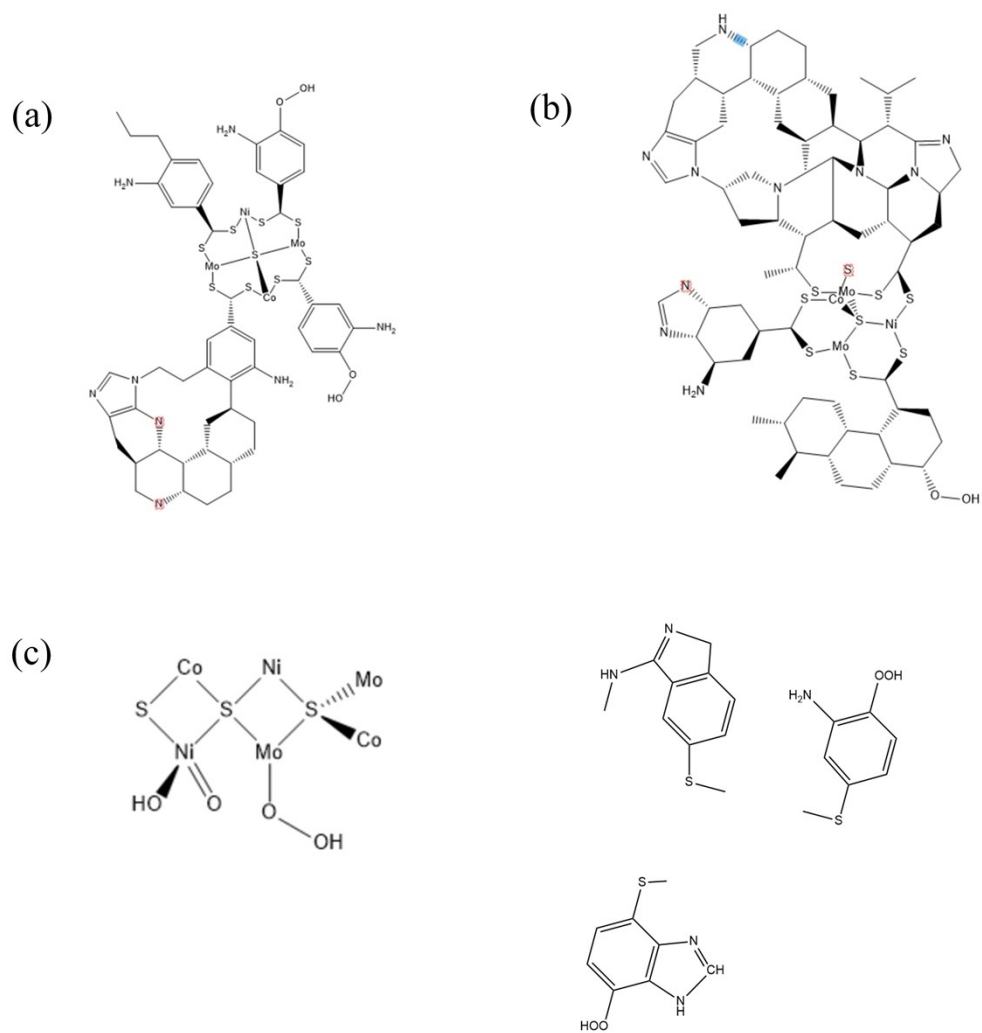

**Fig. S21.** Structural inference (taking a basic unit as an example). (a) MILN-based Co(z)-NiMoS, (b) after HER stability test, (c) after OER stability test.

**Table S1.** Ni, Mo and Co cation content level of MILN-based Co(z)-NiMoS electrodes calculated by ICP-MS.

| element | Sample element content<br>$C_x$ (mg/kg) | w%     |
|---------|-----------------------------------------|--------|
| Co      | 7759.26                                 | 0.78%  |
| Mo      | 12097.80                                | 1.21%  |
| Ni      | 796678.24                               | 79.67% |

**Table S2.** Comparison of electrochemical performance for MILN-based Co(z)-NiMoS with other non-noble metal bifunctional electrocatalysts for water splitting (1.0 M KOH solution)

| Catalysts                                                                                          | HER activity  |                                        | OER activity  |                                        | OWS activity |              | $C_{dl}$    | References       |
|----------------------------------------------------------------------------------------------------|---------------|----------------------------------------|---------------|----------------------------------------|--------------|--------------|-------------|------------------|
|                                                                                                    | $\mu 10$ (mV) | Tafel slope<br>(mV dec <sup>-1</sup> ) | $\mu 10$ (mV) | Tafel slope<br>(mV dec <sup>-1</sup> ) | $\mu 10$ (V) | $\mu 50$ (V) |             |                  |
| <b>MILN-based Co(z)-<br/>NiMoS</b>                                                                 | <b>169</b>    | <b>71</b>                              | <b>170</b>    | <b>33</b>                              | <b>1.466</b> | <b>1.75</b>  | <b>17.4</b> | <b>This work</b> |
| <b>Co<sub>3</sub>O<sub>4</sub>@Mo-CO<sub>3</sub>S<sub>4</sub>-<br/>Ni<sub>3</sub>S<sub>2</sub></b> | 116           | 97                                     | 295           | 98                                     | 1.62         | 1.85         | 21          | <b>1</b>         |
| <b>defect-Ni-MOF</b>                                                                               | 101           | 42.3                                   | 219           | 48.2                                   | 1.5          | 1.6          | 2.92        | <b>2</b>         |
| <b>CoNi<sub>2</sub>S<sub>4</sub>/Ni<sub>3</sub>S<sub>2</sub></b>                                   | 171           | 88.6                                   | 243           | 28.1                                   | 1.65         | 1.85         | 35.1        | <b>3</b>         |

|                                                    |      |      |     |      |      |      |      |   |
|----------------------------------------------------|------|------|-----|------|------|------|------|---|
| $\text{Ni}_x\text{Co}_{1-x}\text{MoO}_4@\text{Co}$ | 51   | 63   | 180 | 43   | 1.46 | 1.65 | 4.5  | 4 |
| $\text{MoO}_4$                                     |      |      |     |      |      |      |      |   |
| {111} faceted $\text{Ni}_3\text{S}_2$              | 189  | 89.3 | 296 | 65.1 | 1.55 | -    | 2.38 | 5 |
| $\text{Ni}_3\text{S}_2/\text{MoS}_2$               | 78   | 62   | 260 | 59   | 1.53 | 1.69 | -    | 6 |
| 0.4 Co:FePi                                        | 82.3 | 221  | 227 | 42.6 | 1.72 | 2.4  | -    | 7 |

**Table S3.** Comparison of electrochemical performance for prepared catalysts for HER, OER and OWS (1.0 M KOH solution)

| Overpotential    | MILN-based   | Co(z)-NiMoS | MILN-based   | Co-NiMoS     | NiMoS       | MIL-88B(Ni/Mo)-NH <sub>2</sub> |
|------------------|--------------|-------------|--------------|--------------|-------------|--------------------------------|
|                  | Co(z)-NiMoS  |             | Co-NiMoS     |              |             |                                |
| <b>HER</b>       |              |             |              |              |             |                                |
| $\mu_{10}$ (mV)  | <b>168</b>   | <b>205</b>  | <b>206</b>   | <b>219</b>   | <b>230</b>  | <b>235</b>                     |
| <b>OER</b>       |              |             |              |              |             |                                |
| $\mu_{10}$ (mV)  | <b>170</b>   | <b>205</b>  | <b>207</b>   | <b>220</b>   | <b>234</b>  | <b>239</b>                     |
| <b>OER</b>       |              |             |              |              |             |                                |
| $\mu_{50}$ (mV)  | <b>279</b>   | <b>333</b>  | <b>306</b>   | <b>339</b>   | <b>381</b>  | <b>510</b>                     |
| <b>OER</b>       |              |             |              |              |             |                                |
| $\mu_{100}$ (mV) | <b>399</b>   | <b>447</b>  | <b>482</b>   | <b>478</b>   | <b>602</b>  | <b>656</b>                     |
| <b>OWS</b>       |              |             |              |              |             |                                |
| $\mu_{10}$ (V)   | <b>1.466</b> | <b>1.58</b> | <b>1.588</b> | <b>1.607</b> | <b>1.66</b> | <b>1.827</b>                   |



## References

1. Q. Wu, A. Dong, C. Yang, L. Ye, L. Zhao and Q. Jiang, *Chem. Eng. J.*, 2020, **12**, 127482.
2. J. Zhou, Y. Dou, X. Q. Wu, A. Zhou, L. Shu and J. R. Li, *Small*, 2020, **16**, 1906564.
3. W. Dai, K. Ren, Y.-a. Zhu, Y. Pan, J. Yu and F. Lu, *J. Alloy. Compd.*, 2020, **844**, 156252.
4. Z. Li, M. Zheng, X. Zhao, J. Yang and W. Fan, *Nanoscale*, 2019, **11**, 22820-22831.
5. L. Li, C. Sun, B. Shang, Q. Li, J. Lei, N. Li and F. Pan, *Journal of Materials Chemistry A*, 2019, **7**, 18003-18011.
6. C. Wang, X. Shao, J. Pan, J. Hu and X. Xu, *Appl. Catal. B-environ*, 2020, **268**, 118435.
7. S. A. Khalate, S. A. Kadam, Y.-R. Ma, S. S. Pujari and U. M. Patil, *J. Alloys Compd.*, 2021, **885**, 160914.
